# Supplementary material for: Novel iron doped calcium oxalates as promising heterogeneous catalysts for one-pot multi-component synthesis of pyranopyrazoles
Source: Royal Society of Chemistry journal article supplement (doi:10.1039/c6ra25372e), 2017-01-01
Supplement: c6ra25372e1.pdf [file c6ra25372e1.pdf]

## Novel iron doped calcium oxalates as promising heterogeneous catalysts for one-pot multi-component synthesis of pyranopyrazoles

Kranthi Kumar Gangu, Suresh Maddila, Surya Narayana Maddila and Sreekantha B Jonnalagadda\*

\*School of Chemistry & Physics, University of KwaZulu-Natal, Westville Campus, Chiltern Hills, Durban-4000, South Africa

\*Corresponding Author: Prof. Sreekantha B. Jonnalagadda  
School of Chemistry & Physics,  
University of KwaZulu-Natal,  
Durban 4000, South Africa.  
Tel.: +27 31 2607325,  
Fax: +27 31 2603091  
E-mail address: [jonnalagaddas@ukzn.ac.za](mailto:jonnalagaddas@ukzn.ac.za)

| <b>Contents</b>                                 | <b>Pages</b> |
|-------------------------------------------------|--------------|
| <b>Fig. S1 and Table S1</b>                     | <b>2</b>     |
| <b>Fig. S2 and Fig. S3</b>                      | <b>3</b>     |
| <b>Fig. S4</b>                                  | <b>4</b>     |
| <b>Products characterization data</b>           | <b>4,5</b>   |
| <b>All the synthesized spectral information</b> | <b>5-14</b>  |

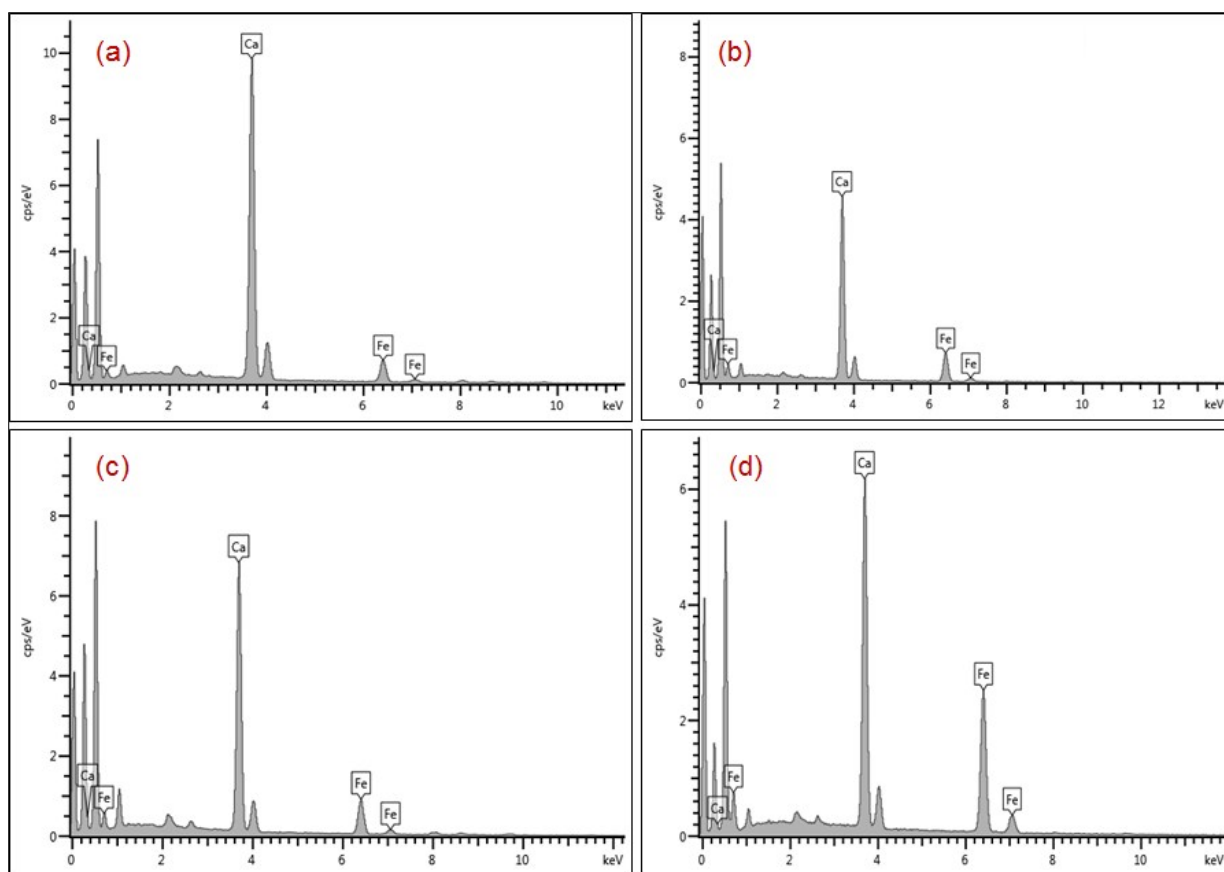

**Fig. S1.** EDX spectra of (a) 0.5 Fe-CaOx/glu (b) 1.0 Fe-CaOx/glu (c) 2.0 Fe-CaOx/glu (d) 3.0 Fe-CaOx/glu

**Table S1:** Optimization of the amount of 2.0 Fe-CaOx/glu as catalyst in the model reaction<sup>a</sup>

| Entry | Catalyst (mg) | Time (min) | Yield (%) |
|-------|---------------|------------|-----------|
| 1     | 10            | 15         | 91        |
| 2     | 20            | 10         | 98        |
| 3     | 30            | 10         | 96        |
| 4     | 40            | 10         | 94        |
| 5     | 50            | 15         | 92        |

<sup>a</sup>Reaction conditions: 3-fluoro benzaldehyde (1.0 mmol), malononitrile (1.0 mmol), hydrazine hydrate (1.0 mmol), dimethyl acetylenedicarboxylic acid (1.0 mmol), catalyst (20 mg) and ethanol (5.0 mL) were refluxed at 50 °C

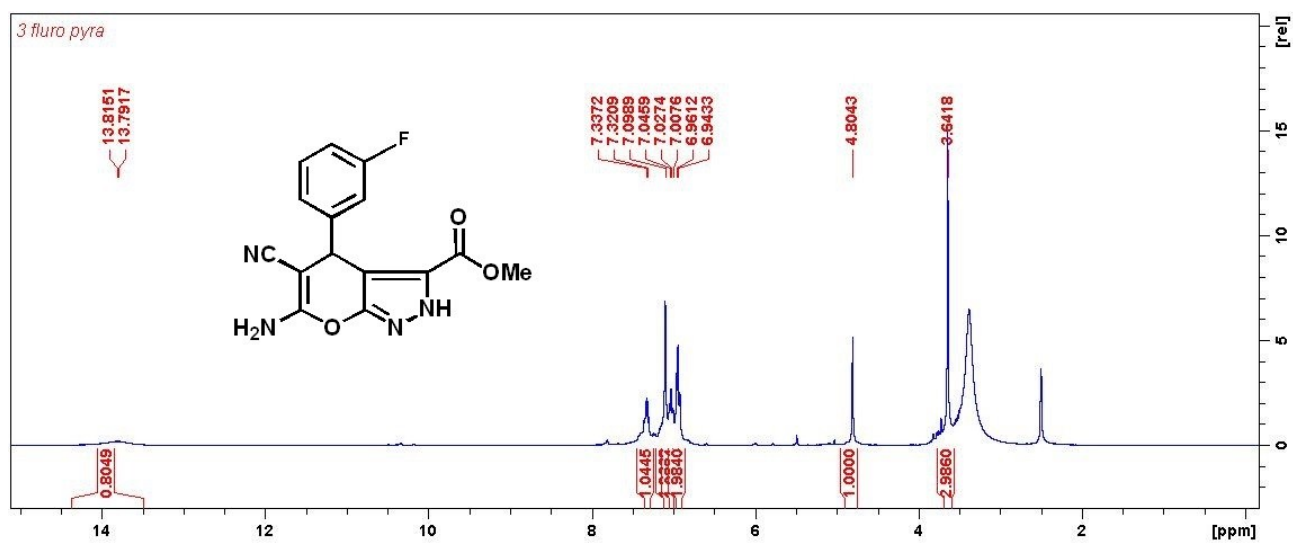

**Fig. S2.**  $^1\text{H}$ -NMR spectrum of methyl 6-amino-5-cyano-4-(3-fluorophenyl)-2,4-dihydropyrano[2,3-c]pyrazole-3-carboxylate

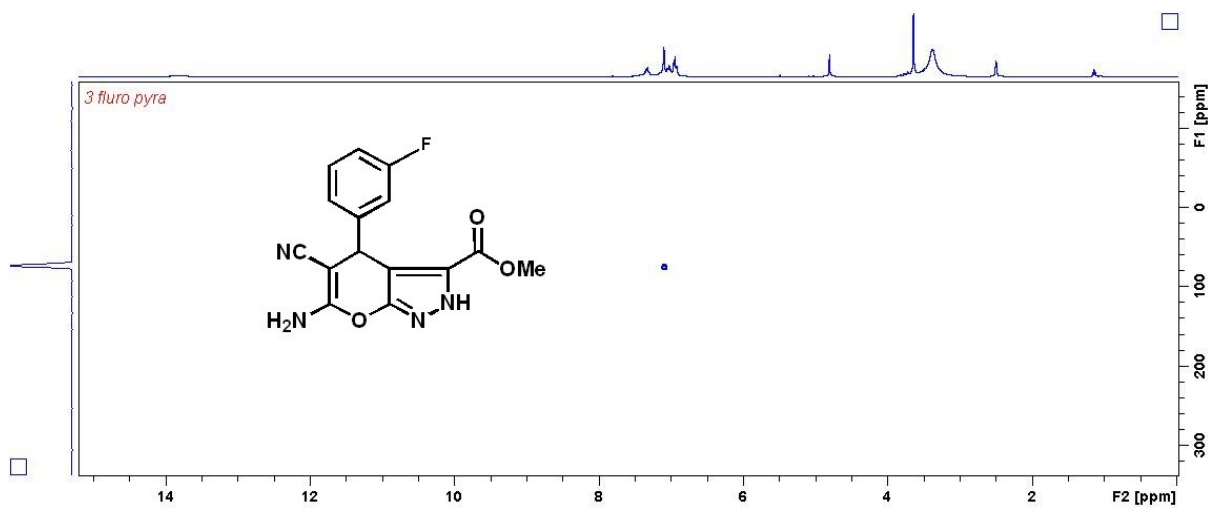

**Fig. S3.**  $^{15}\text{N}$ -NMR spectrum of methyl 6-amino-5-cyano-4-(3-fluorophenyl)-2,4-dihydropyrano[2,3-c]pyrazole-3-carboxylate

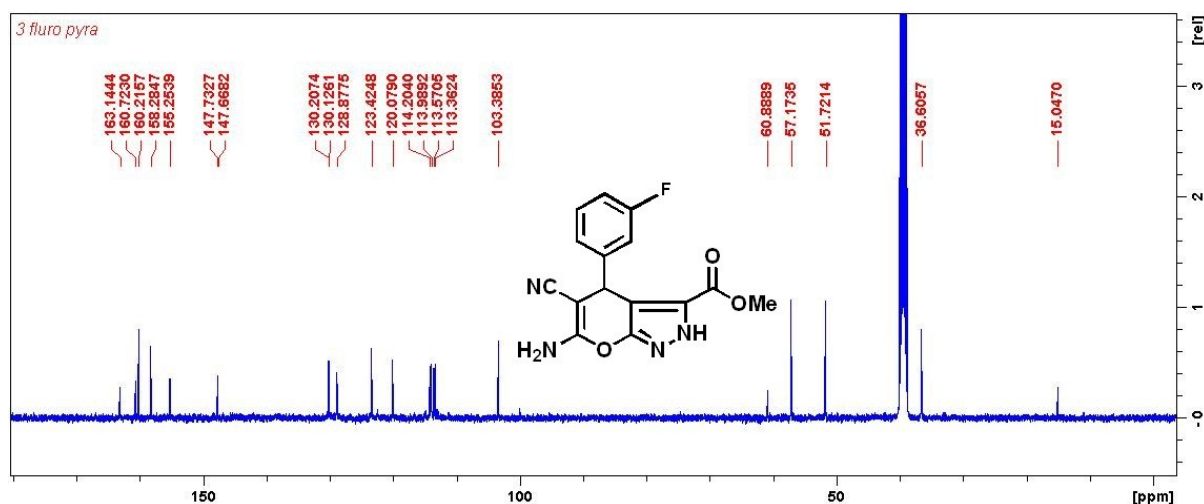

**Fig. S4.**  $^{13}\text{C}$ -NMR spectrum of methyl 6-amino-5-cyano-4-(3-fluorophenyl)-2,4-dihydropyrano[2,3-c]pyrazole-3-carboxylate

#### Spectral data of products:

Entry 1:

**6-amino-4-(4-Methoxyphenyl)-3-methyl-2,4-dihydropyrano[2,3-c]pyrazole-5-carbonitrile;**- $^1\text{H}$  NMR (400 MHz, DMSO- $d_6$ ) 3.65 (s, 3H, OCH<sub>3</sub>), 3.70 (s, 3H, OCH<sub>3</sub>), 4.68 (s, 1H, CH), 6.83 (d,  $J = 8.52$  Hz, 2H, ArH), 6.99 (s, 1H, NH<sub>2</sub>) 7.03 (t,  $J = 8.88$  Hz, 2H, ArH), 13.69 (s, 1H, NH).  $^{13}\text{C}$  NMR (100 MHz, DMSO- $d_6$ ): 36.19, 51.71, 54.92, 58.03, 113.53, 114.56, 128.34, 129.93, 137.03, 157.85, 160.02, 160.44;  $^{15}\text{N}$  NMR (40.55 MHz, DMSO- $d_6$ )  $\delta$  7.08 (s, 2H, NH<sub>2</sub>).

Entry 2:

**6-amino-4-(4-Bromophenyl)-3-methyl-2,4-dihydropyrano[2,3-c]pyrazole-5-carbonitrile;**- $^1\text{H}$  NMR (400 MHz, DMSO- $d_6$ ) 3.64 (s, 3H, OCH<sub>3</sub>), 4.75 (s, 1H, CH), 7.08 (s, 1H, NH<sub>2</sub>), 7.47 (d,  $J = 8.28$  Hz, 2H, ArH), 7.72 (d,  $J = 8.36$  Hz, 1H, ArH), 7.82 (d,  $J = 8.48$  Hz, 1H, ArH), 13.77 (s, 1H, NH).  $^{13}\text{C}$  NMR (100 MHz, DMSO- $d_6$ ): 32.23, 51.62, 56.28, 103.92, 109.77, 115.35, 119.45, 122.00, 133.56, 151.04, 153.11, 156.47, 160.74;  $^{15}\text{N}$  NMR (40.55 MHz, DMSO- $d_6$ )  $\delta$  7.08 (s, 2H, NH<sub>2</sub>).

Entry 3:

**6-amino-4-(4-Chlorophenyl)-3-methyl-2,4-dihydropyrano[2,3-c]pyrazole-5-carbonitrile;**- $^1\text{H}$  NMR (400 MHz, DMSO- $d_6$ ) 3.66 (s, 3H, OCH<sub>3</sub>), 4.78 (s, 1H, CH), 7.06 (s, 1H, NH<sub>2</sub>), 7.16 (d,  $J = 5.68$  Hz, 2H, ArH), 7.35 (d,  $J = 5.52$  Hz, 2H, ArH), 13.78 (s, 1H, NH).  $^{13}\text{C}$  NMR (100

MHz, DMSO-d<sub>6</sub>): 36.98, 52.23, 57.88, 104.11, 120.57, 128.69, 129.77, 144.32, 155.78, 158.78, 160.72; <sup>15</sup>N NMR (40.55 MHz, DMSO-d<sub>6</sub>) δ 7.06 (s, 2H, NH<sub>2</sub>).

Entry 4:

**6-amino-4-(3-Hydroxyphenyl)-3-methyl-2,4-dihydropyrano[2,3-c]pyrazole-5-carbonitrile;-** <sup>1</sup>H NMR (400 MHz, DMSO-d<sub>6</sub>) 3.66 (s, 3H, OCH<sub>3</sub>), 4.63 (s, 1H, CH), 6.53 (s, 1H, ArH), 6.59 – 6.62 (m, 2H, ArH), 6.83 (s, 1H, NH<sub>2</sub>) 7.09 (t, *J* = 7.8 Hz, 1H, ArH), 9.29 (s, 1H, OH), 13.24 (s, 1H, NH). <sup>13</sup>C NMR (100 MHz, DMSO-d<sub>6</sub>): 36.14, 57.26, 97.66, 113.80, 114.10, 118.15, 120.77, 129.23, 135.53, 145.93, 154.73, 157.39, 160.80; <sup>15</sup>N NMR (40.55 MHz, DMSO-d<sub>6</sub>) δ 6.83 (s, 2H, NH<sub>2</sub>).

Entry 5:

**6-amino-4-(2-Chlorophenyl)-3-methyl-2,4-dihydropyrano[2,3-c]pyrazole-5-carbonitrile;-** <sup>1</sup>H NMR (400 MHz, DMSO-d<sub>6</sub>) 3.57 (s, 3H, OCH<sub>3</sub>), 5.26 (s, 1H, CH), 7.05 (s, 1H, NH<sub>2</sub>), 7.21 – 7.25 (m, 2H, ArH), 7.38 (dd, *J* = 7.68 Hz, 0.96 Hz, 1H, ArH), 7.56 – 7.59 (m, 1H, ArH), 13.76 (s, 1H, NH). <sup>13</sup>C NMR (100 MHz, DMSO-d<sub>6</sub>): 32.71, 51.62, 56.86, 104.21, 111.45, 120.53, 121.24, 123.23, 128.45, 137.25, 146.39, 152.25, 155.82, 158.46, 160.42; <sup>15</sup>N NMR (40.55 MHz, DMSO-d<sub>6</sub>) δ 7.05 (s, 2H, NH<sub>2</sub>).

Entry 6:

**6-amino-5-cyano-4-(thiophen-2-yl)-3-methyl-2,4-dihydropyrano[2,3-c]pyrazole-3-carboxylate;-** <sup>1</sup>H NMR (400 MHz, DMSO-d<sub>6</sub>) 3.75 (s, 3H, OCH<sub>3</sub>), 5.14 (s, 1H, CH), 6.92 (t, *J* = 0.96 Hz, 1H, ArH), 6.96 (d, *J* = 1.88 Hz, 1H, ArH), 7.12 (s, 2H, NH<sub>2</sub>), 7.34 (d, *J* = 3.56 Hz, 1H, ArH), 13.81 (s, 1H, NH). <sup>13</sup>C NMR (100 MHz, DMSO-d<sub>6</sub>): 31.13, 32.59, 52.39, 58.22, 104.70, 120.60, 124.71, 125.08, 127.09, 128.75, 129.36, 131.44, 134.22, 138.88, 149.91, 155.36, 156.23, 158.93, 160.92; <sup>15</sup>N NMR (40.55 MHz, DMSO-d<sub>6</sub>) δ 7.12 (s, 2H, NH<sub>2</sub>).

Entry 7:

**6-amino-5-cyano-4-(furan-2-yl)-3-methyl-2,4-dihydropyrano[2,3-c]pyrazole-3-carboxylate;-** <sup>1</sup>H NMR (400 MHz, DMSO-d<sub>6</sub>) 3.75 (s, 3H, OCH<sub>3</sub>), 4.93 (s, 1H, CH), 6.16 (d, *J* = 2.08 Hz, 1H, ArH), 6.35 (d, *J* = 0.96 Hz, 1H, ArH), 7.10 (s, 2H, NH<sub>2</sub>), 7.48 (d, *J* = 1.52 Hz, 1H, ArH), 13.78 (s, 1H, NH). <sup>13</sup>C NMR (100 MHz, DMSO-d<sub>6</sub>): 31.18, 52.38, 55.20, 101.96, 105.96, 110.79, 120.50, 129.43, 142.46, 155.72, 158.97, 161.42; <sup>15</sup>N NMR (40.55 MHz, DMSO-d<sub>6</sub>) δ 7.10 (s, 2H, NH<sub>2</sub>).

Entry 1:

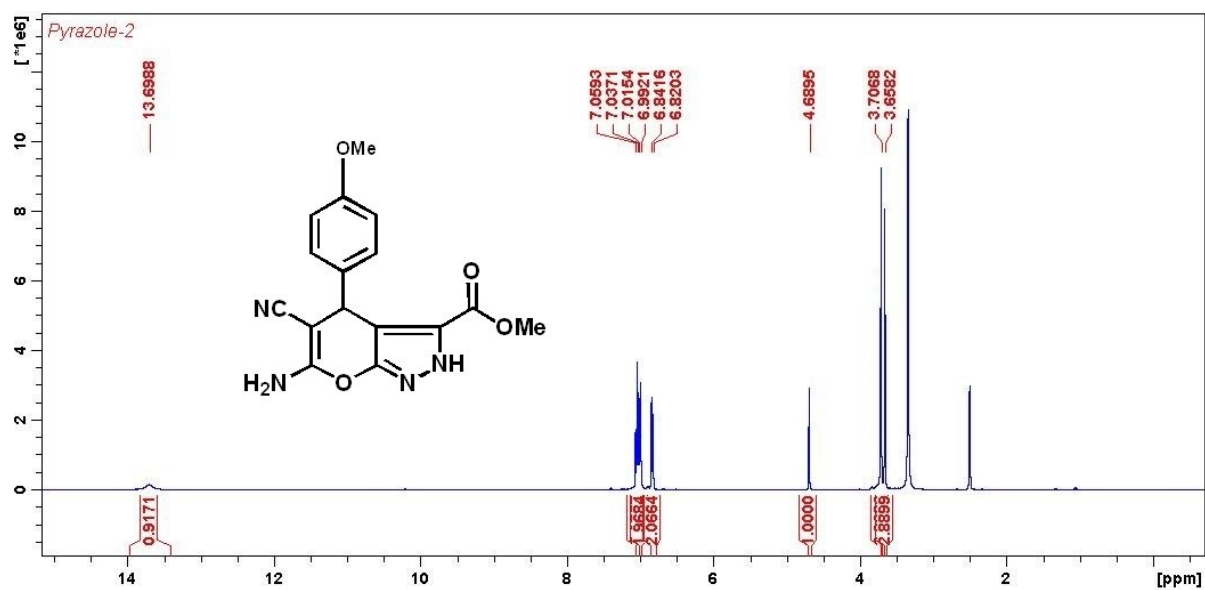

<sup>1</sup>H NMR spectrum of 6-amino-4-(4-Methoxyphenyl)-3-methyl-2,4-dihydropyrano[2,3-c]pyrazole-5-carbonitrile

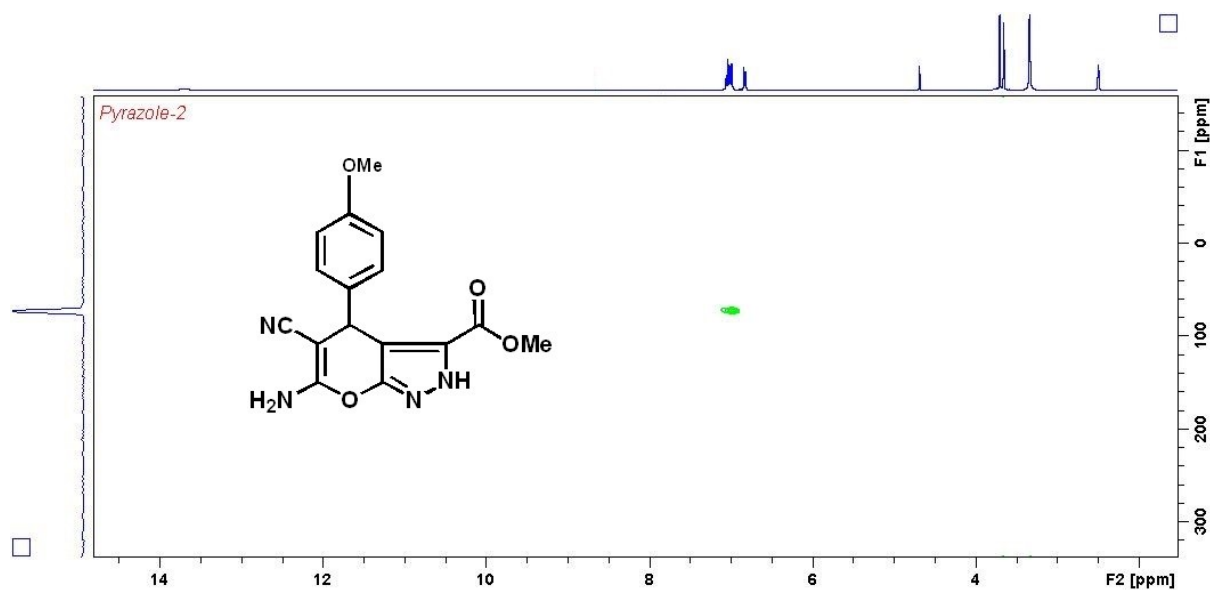

<sup>15</sup>N NMR spectrum of 6-amino-4-(4-Methoxyphenyl)-3-methyl-2,4-dihydropyrano[2,3-c]pyrazole-5-carbonitrile

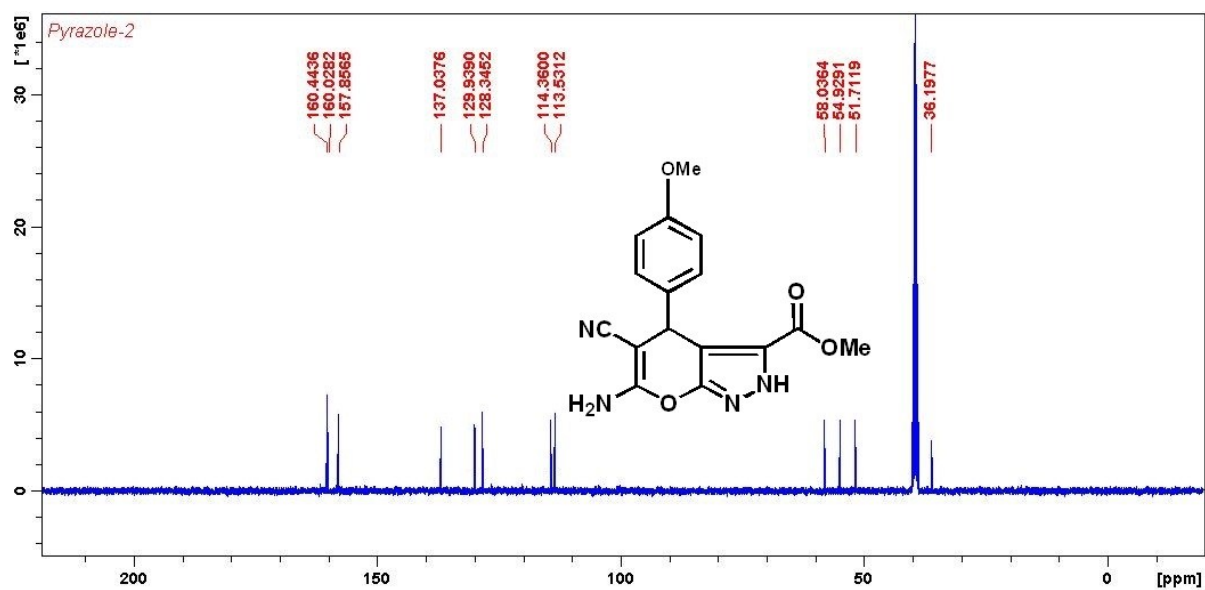

<sup>13</sup>C NMR spectrum of 6-amino-4-(4-Methoxyphenyl)-3-methyl-2,4-dihydropyrano[2,3-c]pyrazole-5-carbonitrile

Entry 2:

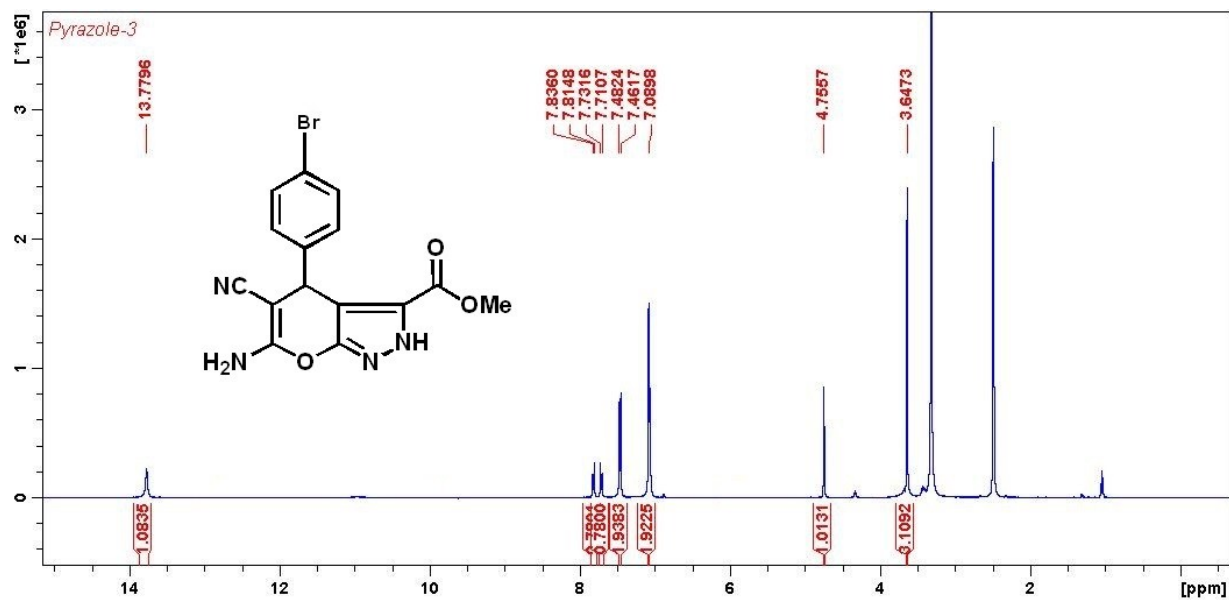

<sup>1</sup>H NMR spectrum of 6-amino-4-(4-Bromophenyl)-3-methyl-2,4-dihydropyrano[2,3-c]pyrazole-5-carbonitrile

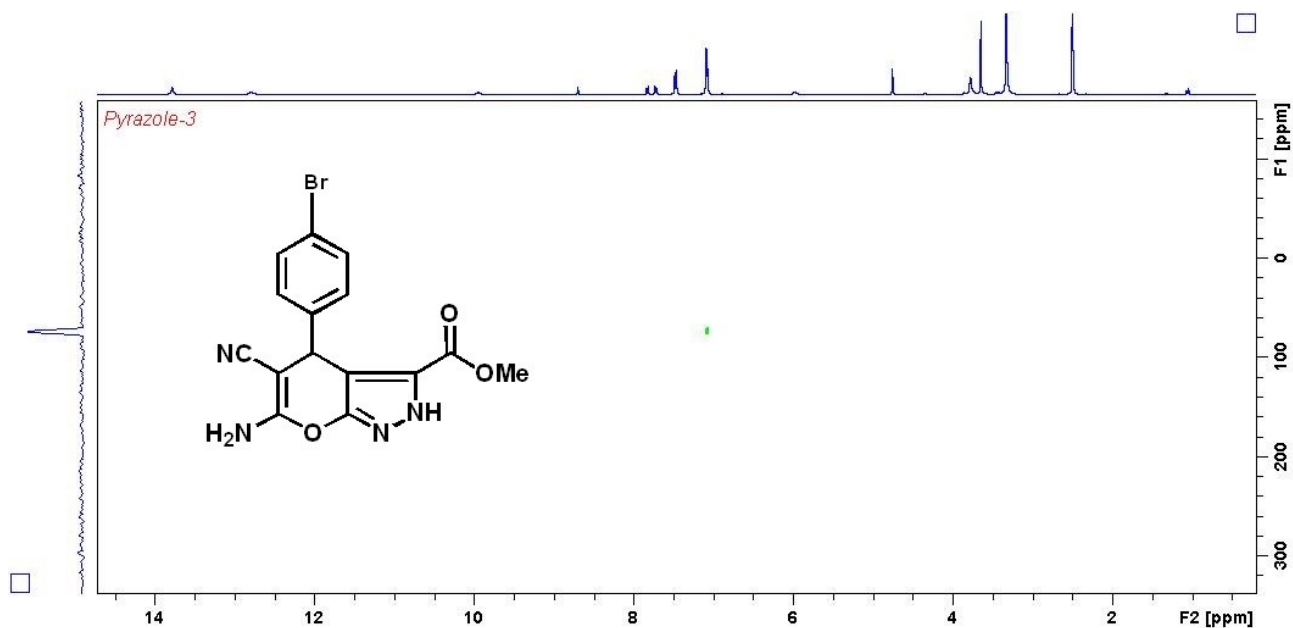

<sup>15</sup>N NMR spectrum of 6-amino-4-(4-Bromophenyl)-3-methyl-2,4-dihydropyrano[2,3-c]pyrazole-5-carbonitrile

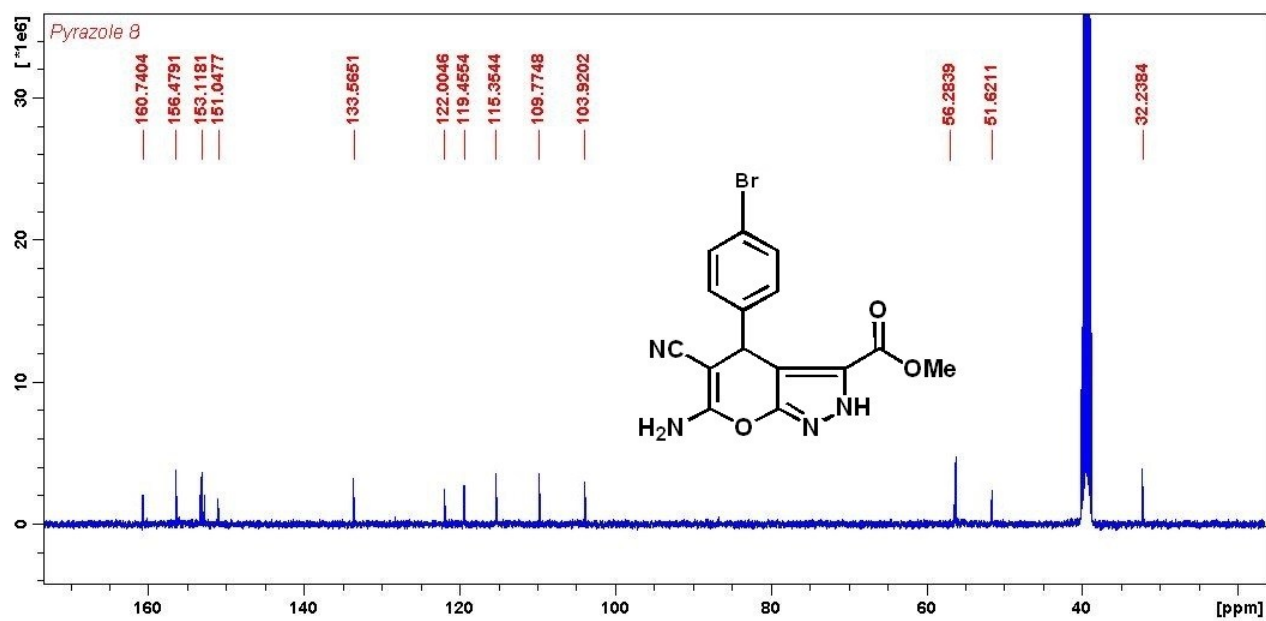

<sup>13</sup>C NMR spectrum of 6-amino-4-(4-Bromophenyl)-3-methyl-2,4-dihydropyrano[2,3-c]pyrazole-5-carbonitrile



Entry 3:

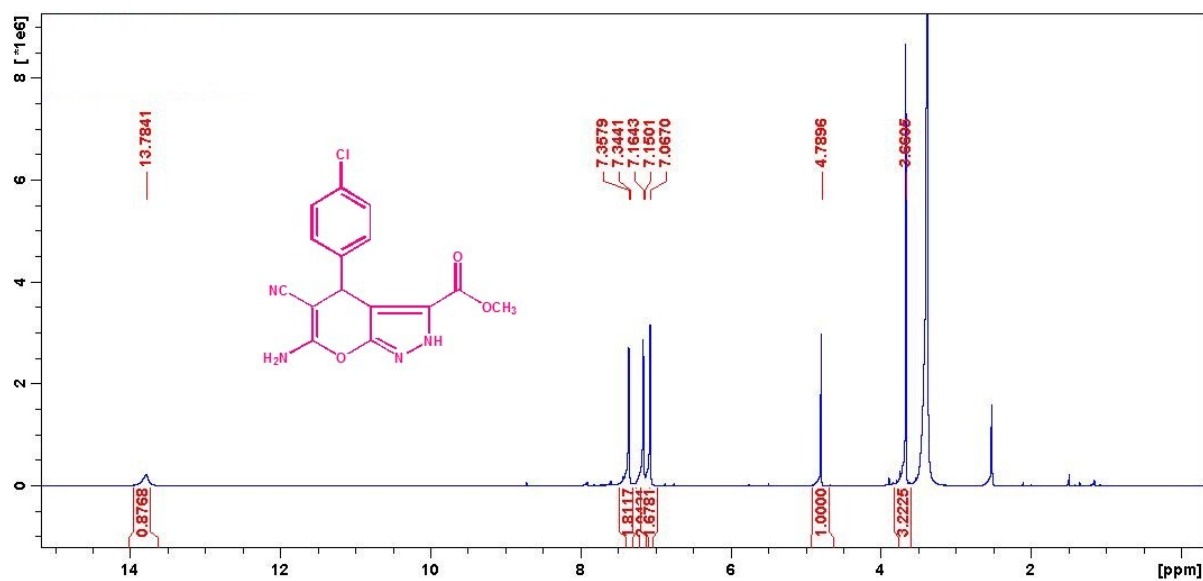

<sup>1</sup>H NMR spectrum of 6-amino-4-(4-Chlorophenyl)-3-methyl-2,4-dihydropyrano[2,3-c]pyrazole-5-carbonitrile

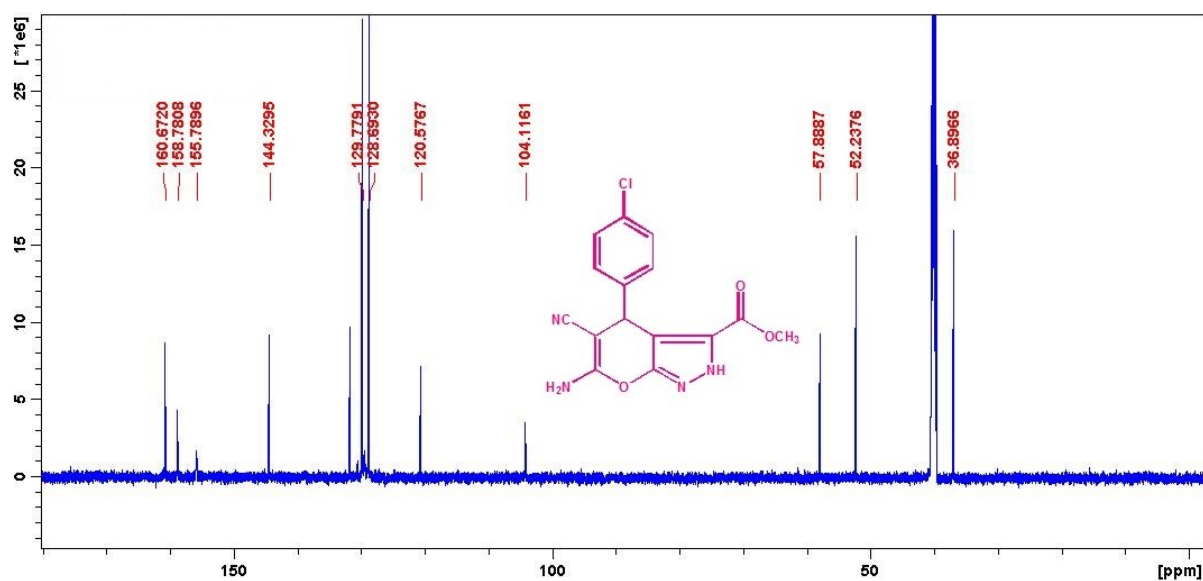

<sup>13</sup>C NMR spectrum of 6-amino-4-(4-Chlorophenyl)-3-methyl-2,4-dihydropyrano[2,3-c]pyrazole-5-carbonitrile

Entry 4:

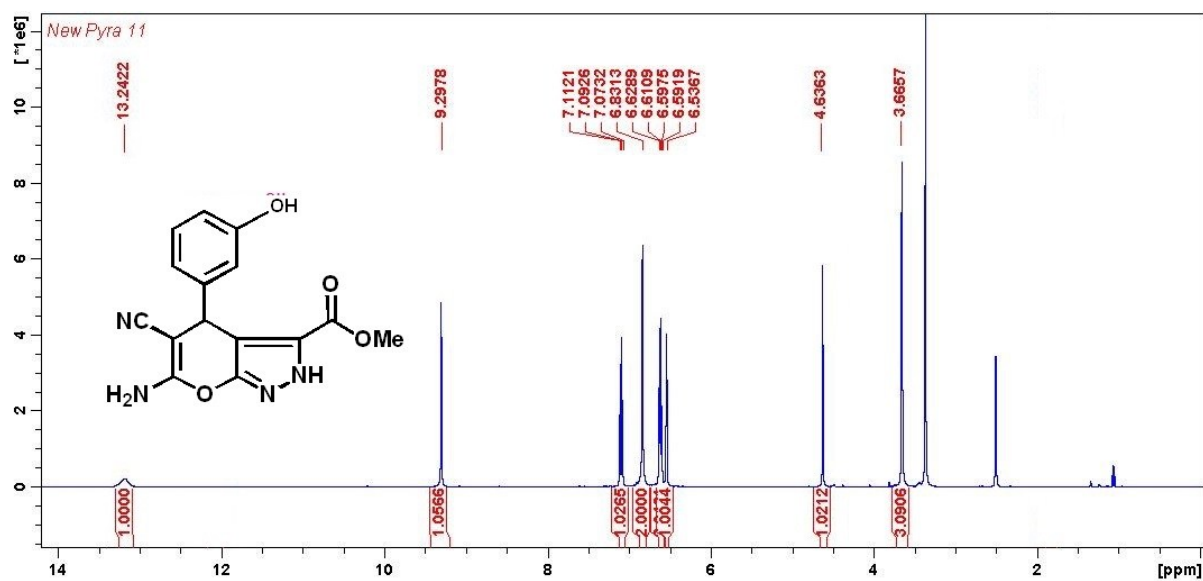

<sup>1</sup>H NMR spectrum of 6-amino-4-(3-Hydroxyphenyl)-3-methyl-2,4-dihydropyrano[2,3-c]pyrazole-5-carbonitrile

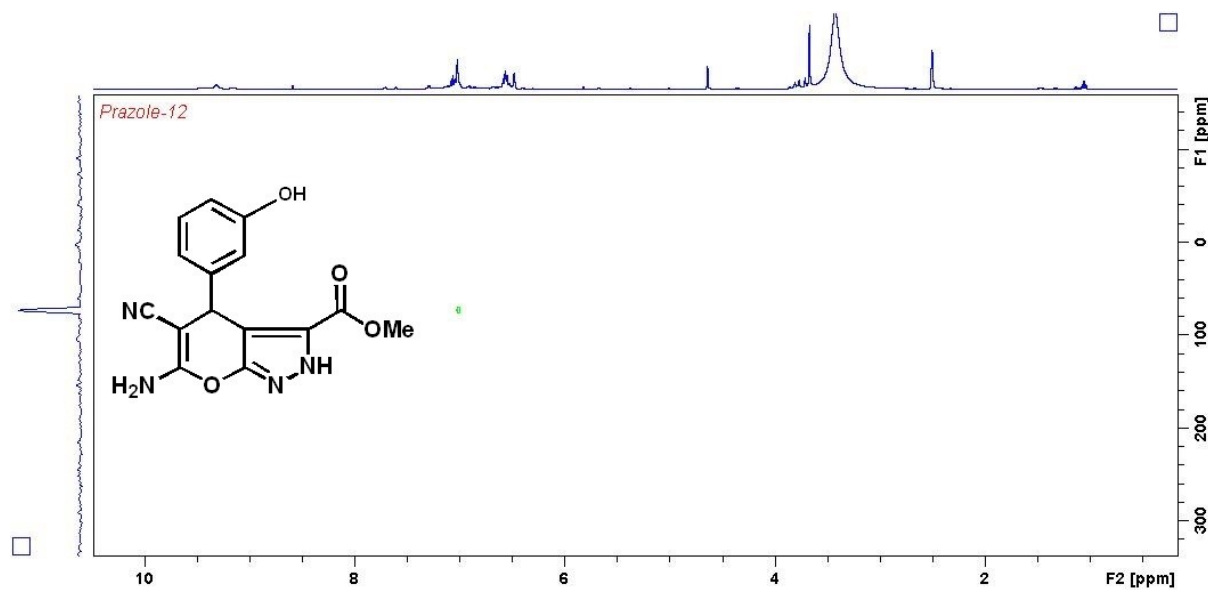

<sup>15</sup>N NMR spectrum of 6-amino-4-(3-Hydroxyphenyl)-3-methyl-2,4-dihydropyrano[2,3-c]pyrazole-5-carbonitrile

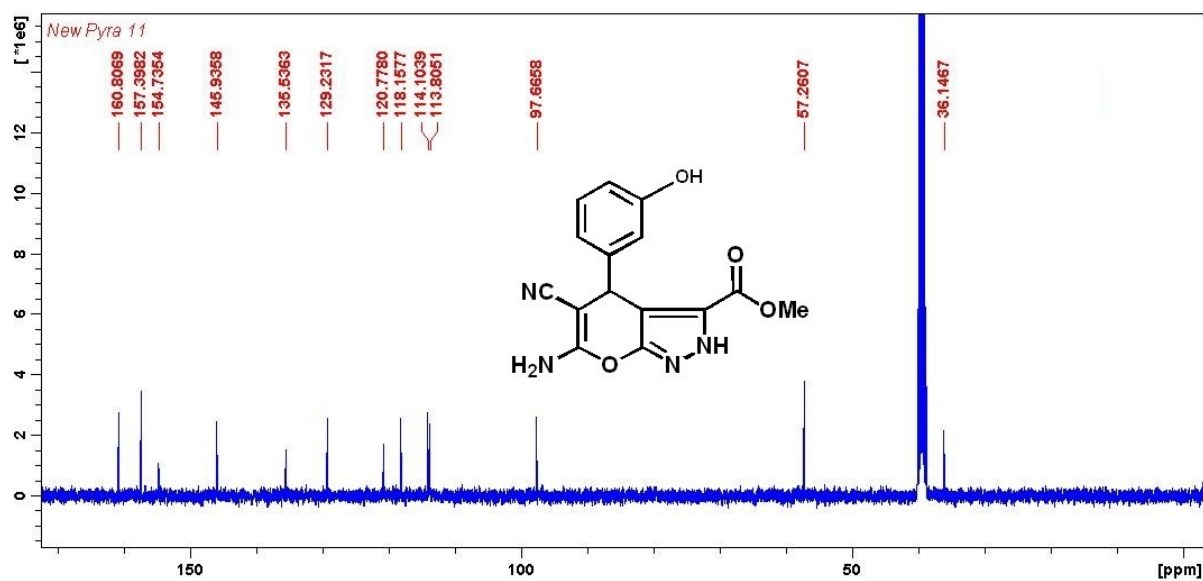

<sup>13</sup>C NMR spectrum of 6-amino-4-(3-Hydroxyphenyl)-3-methyl-2,4-dihydropyrano[2,3-c]pyrazole-5-carbonitrile

Entry 5:

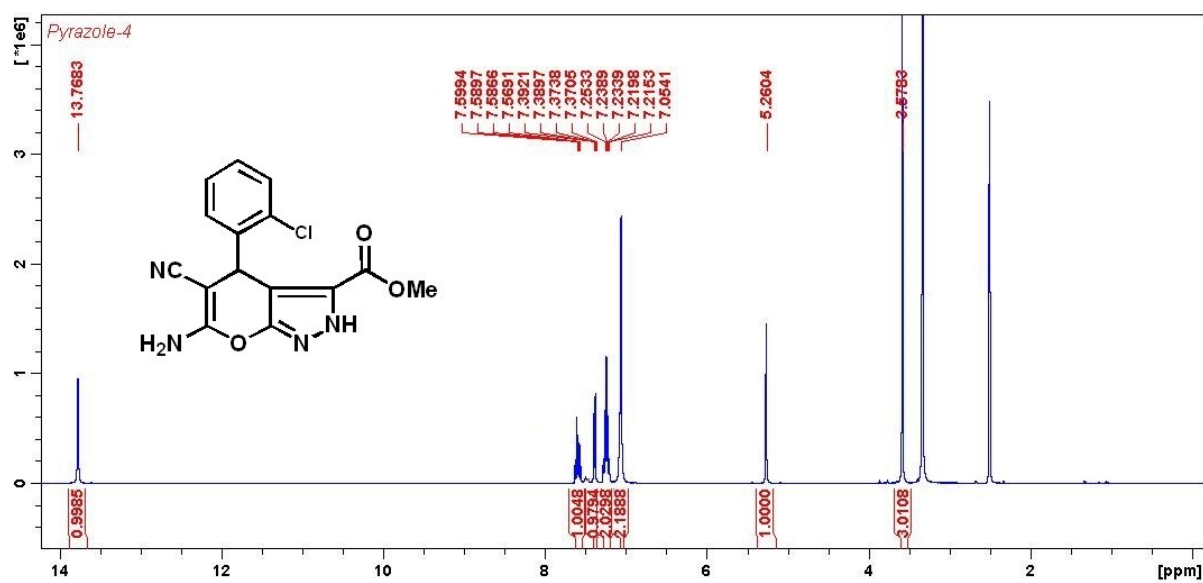

<sup>1</sup>H NMR spectrum of 6-amino-4-(2-Chlorophenyl)-3-methyl-2,4-dihydropyrano[2,3-c]pyrazole-5-carbonitrile

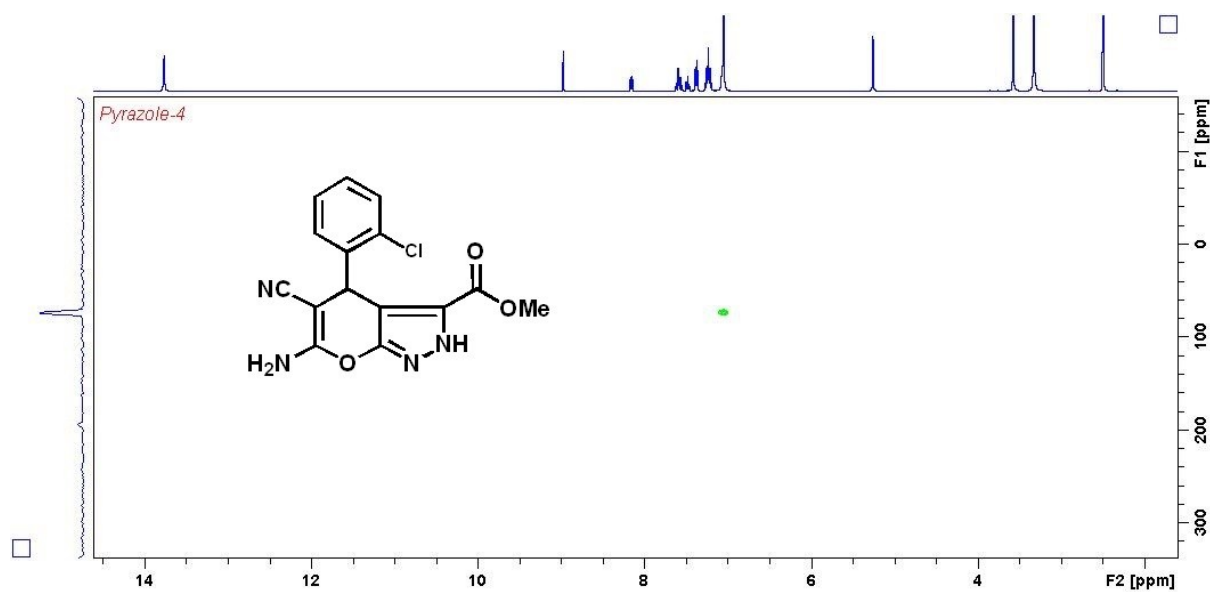

$^{15}\text{N}$  NMR spectrum of 6-amino-4-(2-Chlorophenyl)-3-methyl-2,4-dihydro-2H-pyranopyrazole-5-carbonitrile

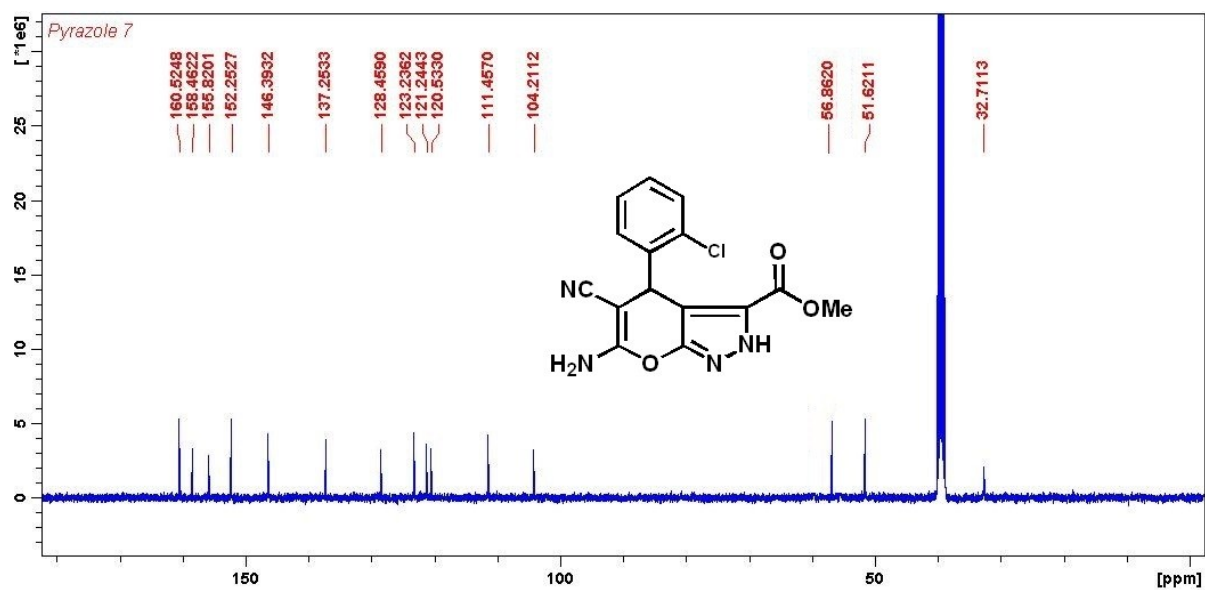

$^{13}\text{C}$  NMR spectrum of 6-amino-4-(2-Chlorophenyl)-3-methyl-2,4-dihydro-2H-pyranopyrazole-5-carbonitrile

Entry 6:

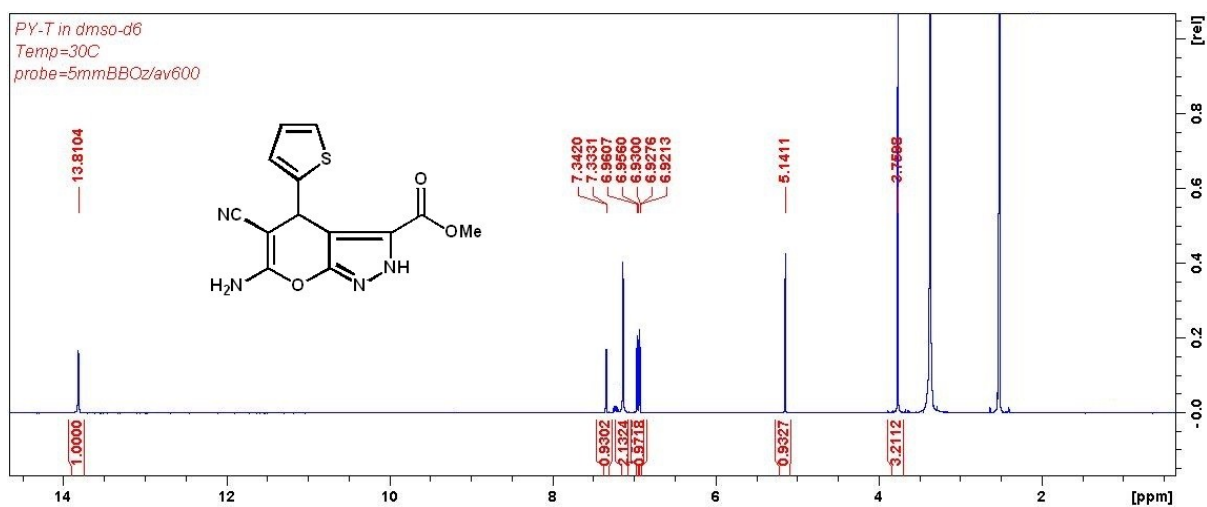

$^1\text{H}$  NMR spectrum of 6-amino-5-cyano-4-(thiophen-2-yl)-3-methyl-2,4-dihydropyrano[2,3-c]pyrazole-3-carboxylate

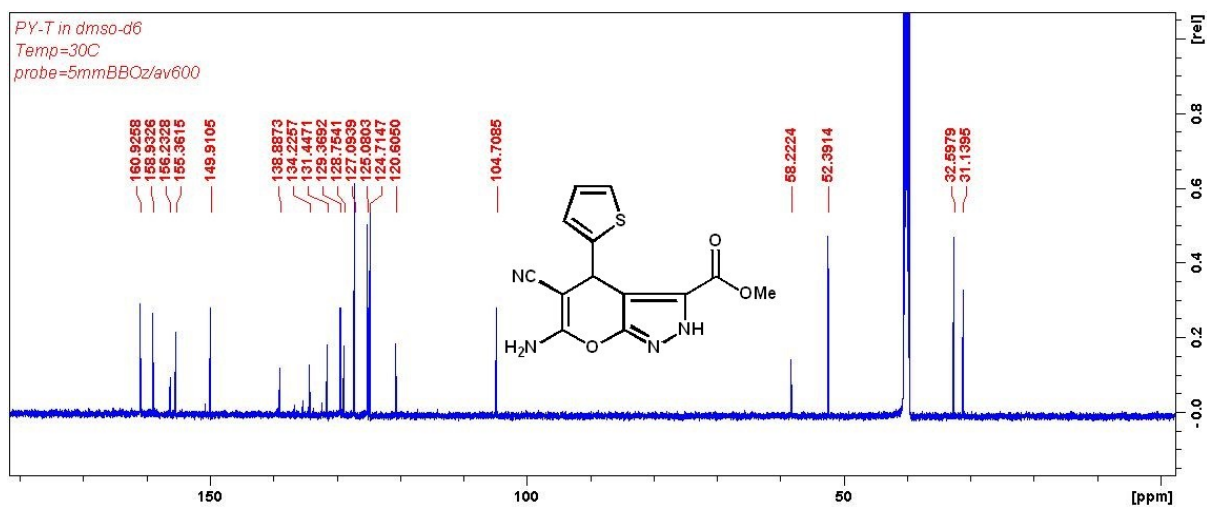

$^{13}\text{C}$  NMR spectrum of 6-amino-5-cyano-4-(thiophen-2-yl)-3-methyl-2,4-dihydropyrano[2,3-c]pyrazole-3-carboxylate

Entry 7:

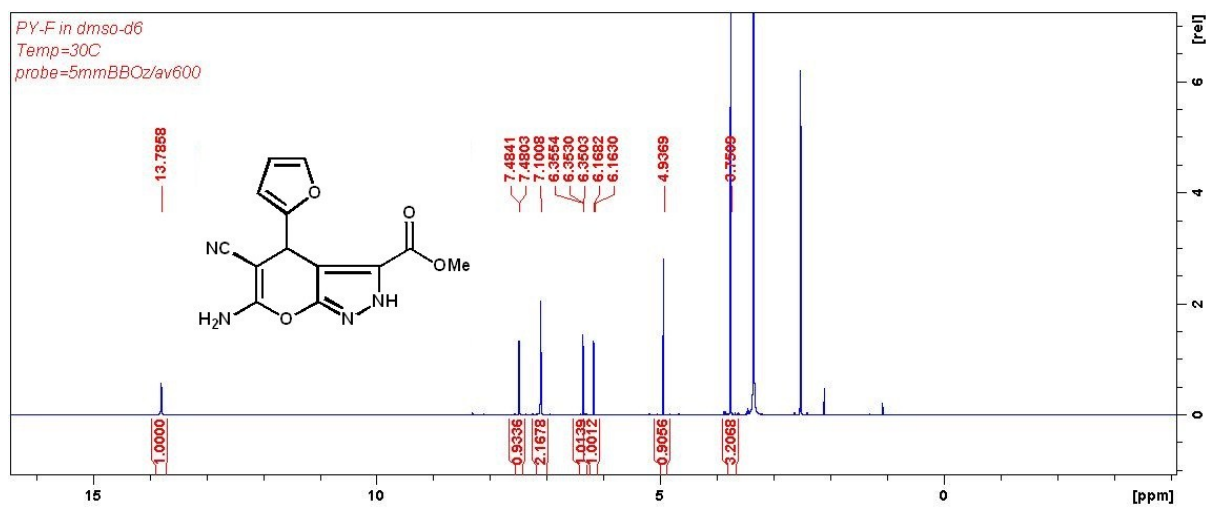

<sup>1</sup>H NMR spectrum of 6-amino-5-cyano-4-(furan-2-yl)-3-methyl-2,4-dihydropyrano[2,3-c]pyrazole-3-carboxylate

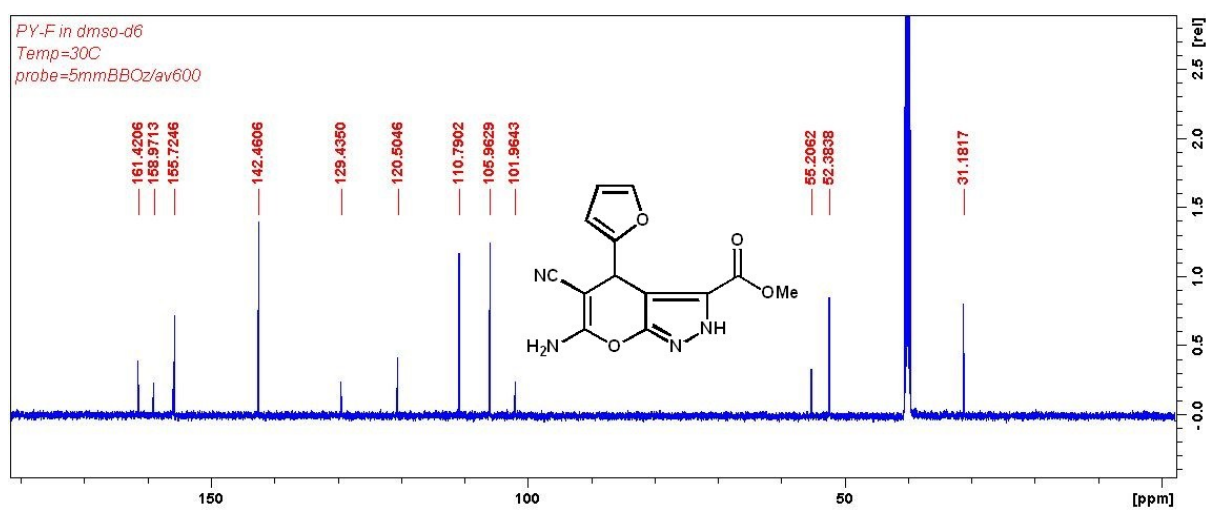

<sup>13</sup>C NMR spectrum of 6-amino-5-cyano-4-(furan-2-yl)-3-methyl-2,4-dihydropyrano[2,3-c]pyrazole-3-carboxylate
